# Supplementary material for: Awareness and Community Response To Stroke Signs and Symptoms Following the National ‘Act Fast’ Campaign in An Ethnically Diverse Population
Source: Research Square preprint supplement (doi:10.21203/rs.3.rs-798434/v1), 2021-08-30
Supplement: Supplementary file 1 [file 402f8f41601156411ae2ee60.docx]

Table 2: Comparison of the basic demographics of the population and its effect in the knowledge perception of the ACT FAST campaign and their behavioral response at the onset of stroke symptoms.

| Variable | Act FAST Awareness | | p-value | EMS Activation | | Total | p-value |
| --- | --- | --- | --- | --- | --- | --- | --- |
|  | Yes, n=27 (%) | No, n=138 (%) |  | Yes, n=55 (%) | No, n=110 (%) | N=165 (%) |  |
| Age, year, mean (SD) | 54.7 (13.2) | 52.18 (11.4) | 0.31 | 54.8 (12.7) | 51.5 (11.2) | 52.6(11.7) | 0.10 |
| Gender, Male  Female | 21 (77.8) | 123 (89.1) | 0.11 | 49 (89.1) | 95 (86.4) | 144(87.3) | 0.62 |
| 6 (22.2) | 15 (10.9) | 0.11 | 6 (10.9) | 15(13.6) | 21(12.7) |  |
| Ethnicity  South Asian  Middle Eastern  Far Eastern  African  Other |  |  |  |  |  |  |  |
| 13 (48.2) | 88 (63.8) |  | 35 (63.6) | 66 (60.0) | 101(61.2) | 0.91 |
| 5 (18.5) | 9 (6.5) |  | 5 (9.1) | 9 (8.2) | 14(8.5) |  |
| 3 (11.1) | 23 (16.7) |  | 7 (12.7) | 19 (17.3) | 26(15.8) |  |
| 3 (11.1) | 13 (9.4) |  | 6 (10.9) | 10 (9.1) | 16(9.7) |  |
| 3 (11.1) | 5 (3.6) | 0.097 | 2 (3.6) | 6 (5.5) | 8(4.8) |  |
| Marital |  |  |  |  |  |  |  |
| Married  Unmarried | 23 (85.2) | 125 (90.6) | 0.399 | 51 (92.7) | 97 (88.2) | 148(89.7) | 0.36 |
| 4 (14.8) | 13 (9.4) |  | 4 (7.3) | 13 (11.8) | 17(10.3) |  |
| Education |  |  |  |  |  |  |  |
| Primary  Secondary  High School  Graduated  Other | 0 (0) | 8 (5.8) | 0.09 | 4 (7.4) | 4 (3.6) | 8(4.9) | 0.25 |
| 1 (3.8) | 26 (18.8) |  | 7 (12.9) | 20 (18.2) | 27(16.5) |  |
| 8 (30.7) | 46 (33.3) |  | 13 (24.1) | 41 (37.3) | 54(32.9) |  |
| 16 (61.5) | 50 (36.2) |  | 26 (48.2) | 40 (36.4) | 66(40.2) |  |
| 1 (3.8) | 8 (5.8) |  | 4 (7.4) | 5 (4.6) | 9(5.5) |  |
| Response |  |  |  |  |  |  |  |
| Drove to hospital  Call friends/relative  Call EMS  Wait to improve  Rest  Other | 3 (11.1) | 30 (21.7) | 0.21 |  |  | 33(20.0) |  |
| 13 (48.2) | 56 (40.6) | 0.47 |  |  | 69(41.8) |  |
| 13 (48.2) | 42 (30.4) | 0.07 |  |  | 55(33.3) |  |
| 0 (0) | 17 (12.3) | 0.054 |  |  | 17(10.3) |  |
| 1 (3.7) | 3 (2.2) | 0.64 |  |  | 4(2.4) |  |
| 2 (7.4) | 10 (7.2) | 0.98 |  |  |  |  |
|  |  |  |  |  |  |  |  |
| Bystander | 10 (37.1) | 13 (9.4) | < 0.001 | 12 (21.8) | 11 (10.0) | 23 (13.9) | 0.039 |
| Self |  |  |  | 43 (78.2) | 99 (90.0) | 142 (86.1) |  |
| First symptom noticed |  |  |  |  |  |  |  |
| Weakness of limbs  Drooping of face  Numbness  Difficulty in talking  Dizziness  Loss of balance  Blurred vision  Headache  Difficulty swallowing  I don’t remember | 19 (70.4) | 83 (60.6) |  | 41 (74.6) | 61 (55.5) | 102(61.8) | 0.02 |
| 4 (14.8) | 8 (5.8) |  | 5 (9.1) | 7 (6.4) | 12(7.3) |  |
| 7 (25.9) | 13 (9.5) |  | 6 (10.9) | 14 (12.7) | 20(12.1) |  |
| 6 (22.2) | 31 (22.6) |  | 12 (21.8) | 25 (22.7) | 37(22.4) |  |
| 5 (18.5) | 31 (22.6) |  | 8 (14.6) | 28 (25.5) | 36(21.8) |  |
| 3 (11.1) | 7 (5.1) |  | 2 (3.6) | 8 (7.3) | 10(6) |  |
| 2 (7.4) | 3 (2.2) |  | 2 (3.6) | 3 (2.7) | 5(3) |  |
| 4 (14.8) | 12 (8.8) |  | 2 (3.6) | 14 (12.7) | 16(9.7) |  |
| 0 (0) | 1 (0.7) |  | 0 (0) | 1 (0.9) | 1(0.6) |  |
| 0 (0) | 1 (0.7) |  | 1 (1.8) | 0 (0) | 1(0.6) |  |
