# Supplementary material for: Awareness and Community Response To Stroke Signs and Symptoms Following the National ‘Act Fast’ Campaign in An Ethnically Diverse Population
Source: Research Square preprint supplement (doi:10.21203/rs.3.rs-798434/v1), 2021-08-30
Supplement: Supplementary file 1 [file b29be9fd99678e1d0821ab4c.pdf]

**الحملة الوطنية للتوعية بالسكتة الدماغية – التقييم والتوعية ما بعد الحملة**

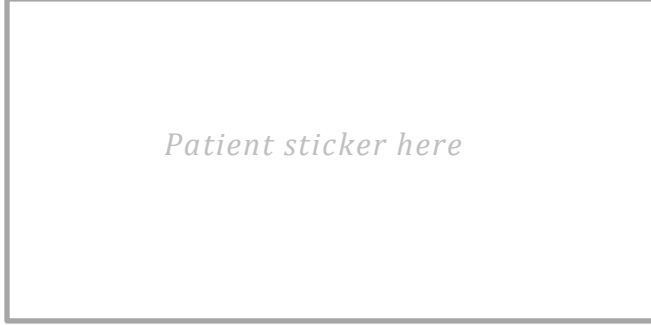

Nationality: \_\_\_\_\_ الجنسيه  
Contacts: \_\_\_\_\_ رقم الاتصال  
Marital Status: \_\_\_\_\_ الحاله الاجتماعيه:  
Education: \_\_\_\_\_ المستوى التعليمي  
Occupation: \_\_\_\_\_ المهنة  
QID/Passport No: \_\_\_\_\_

Study ID Number: \_\_\_\_\_ رقم الدراسه

Relatives/ Witness Name: \_\_\_\_\_ الأقارب/ اسم الشاهد:  
Relation: \_\_\_\_\_ صله القرابه:  
Age: \_\_\_\_\_ العمر  
Contacts: \_\_\_\_\_ رقم الاتصال  
Education: \_\_\_\_\_ المستوى التعليمي  
Occupation: \_\_\_\_\_ المهنة  
QID/Passport No: \_\_\_\_\_

## National Stroke Awareness Campaign – Post Campaign Evaluation and Awareness

الحملة الوطنية للتوعية بالسكتة الدماغية – التقييم والتوعية ما بعد الحملة - Study ID: \_\_\_\_\_ رقم الدراسة

1. Have you seen or heard of any media, advertisement or communication campaign in Qatar about the signs and symptoms of stroke?

☐ YES  
☐ NO

هل رأيت أو سمعت في وسائل الإعلام إعلانات أو حملات تواصل حول علامات و أعراض السكتة الدماغية في قطر؟

☐ نعم  
☐ لا

2. Have you heard of the F.A.S.T campaign for stroke in Qatar?

☐ YES  
☐ NO

- هل سمعت عن حملة التدخل السريع (FAST) للسكتة الدماغية

☐ نعم  
☐ لا

3. If Yes, What does F.A.S.T stand for in this stroke campaign? (recorded verbatim);

\_\_\_\_\_

- إذا كان الجواب نعم، ماذا يعني التدخل (FAST) ( مسجله حرفيا" )  
السريع

\_\_\_\_\_

4. What does the advertisement campaign say about the signs and symptoms of stroke?

\_\_\_\_\_

\_\_\_\_\_

- ماذا تقول الحملة الاعلانية عن علامات وأعراض السكتة الدماغية؟

\_\_\_\_\_

\_\_\_\_\_

5. Where did you see or hear about this stroke campaign in Qatar?

☐ SocialMedia(Facebook, Twitter, YouTube)  
☐ Newspaper/magazine  
☐ School/University  
☐ Shopping Mall/cinema  
☐ Television  
☐ Outdoor billboard  
☐ Internet  
☐ Radio  
☐ Workplace

- أين رأيت أو سمعت عن هذا "الإعلان أو التواصل الإعلامي" حول السكتة الدماغية؟

☐ وسائل التواصل الاجتماعي  
☐ صحيفة الأخبار / مجلة  
☐ المدرسة / الجامعة  
☐ مجمع للتسوق / السينما  
☐ التلفزيون  
☐ لوحة اعلان خارجيه  
☐ الإنترنت  
☐ راديو  
☐ مكان العمل

## National Stroke Awareness Campaign – Post Campaign Evaluation and Awareness

الحملة الوطنية للتوعية بالسكتة الدماغية – التقييم والتوعية ما بعد الحملة - Study ID: \_\_\_\_\_ رقم الدراسة

- |                                          |                                                |
|------------------------------------------|------------------------------------------------|
| <input type="checkbox"/> Hospital        | <input type="checkbox"/> المستشفى              |
| <input type="checkbox"/> Poster/leaflets | <input type="checkbox"/> ملصق / كتيب / منشورات |
| <input type="checkbox"/> can't recall    | <input type="checkbox"/> لا أتذكر              |
| <input type="checkbox"/> Other _____     | <input type="checkbox"/> أخرى                  |

6. Looking at list of symptoms below, what problems did you notice first?

- ☐ Weakness of one arm or leg.
- ☐ drooping of one side of face.
- ☐ Numbness of one arm or leg.
- ☐ Difficulty in talking
- ☐ Dizziness or unsteadiness
- ☐ Loss of balance/ fall
- ☐ Sudden blurred or loss of vision
- ☐ Sudden severe Headache
- ☐ Difficulty in swallowing
- ☐ I don't remember

- ما هي الأعراض أو المشاكل التي انتبهت لها أولاً؟

- ☐ ضعف أو شلل بالذراع أو بالساق
- ☐ ضعف أو شلل بالوجه
- ☐ فقدان بالإحساس بالذراع، الساق أو بالوجه
- ☐ الصعوبة بالكلام
- ☐ الدوخة
- ☐ فقدان التوازن أو سقوط غير مفسر
- ☐ الإصابة المفاجئة بتشويش في الرؤية أو نقصها
- ☐ الصداع
- ☐ صعوبة البلع
- ☐ لا أعلم

7. Apart from the list above, did other symptoms develop during stroke?

- ☐ Yes
- ☐ No

If yes, what were those?

---

---

هل ظهرت أعراض أخرى

- ☐ نعم
- ☐ لا

- إذا كانت الإجابة بنعم، ما هي تلك الأعراض

---

---

8. From the list below, how well the statements below describes your symptoms when you experienced stroke.

Rate on a scale of 1-6: **1= Strongly Disagree, 2= Agree, 3= Neutral, 4= Agree, 5= Strongly Agree. 6= don't know**

- ☐ Weakness of one arm or leg. \_\_\_\_\_
- ☐ Drooping of one side of face. \_\_\_\_\_
- ☐ Numbness of an arm, leg or face. \_\_\_\_\_
- ☐ Difficulty in talking \_\_\_\_\_
- ☐ Dizziness \_\_\_\_\_

من القائمة أدناه، الى أي مدى تصف العبارات التالية الأعراض التي واجهتها عند حدوث السكتة الدماغية؟

قيم على مقياس من 1-6. **1= لا أوافق بشدة , 2= لا أوافق, 3= رأي محايد , 4= أوافق, 5= أوافق بشدة, 6= لا أعلم.**

- ☐ ضعف أو شلل بالذراع أو بالساق
- ☐ ضعف أو شلل بالوجه
- ☐ فقدان بالإحساس بالذراع، الساق أو بالوجه
- ☐ الصعوبة بالكلام
- ☐ الدوخة

## National Stroke Awareness Campaign – Post Campaign Evaluation and Awareness

الحملة الوطنية للتوعية بالسكتة الدماغية – التقييم والتوعية ما بعد الحملة - Study ID: \_\_\_\_\_ رقم الدراسة

- ☐ Loss of balance/ unexplained fall \_\_\_\_\_
- ☐ Sudden blurred or loss of vision \_\_\_\_\_
- ☐ Sudden severe Headache \_\_\_\_\_
- ☐ Difficulty in swallowing \_\_\_\_\_
- ☐ I don't remember \_\_\_\_\_

- ☐ فقدان التوازن أو سقوط غير مفسر
- ☐ الإصابة المفاجئة بتشويش في الرؤية أو نقصها
- ☐ الصداع
- ☐ صعوبة البلع
- ☐ لا أعلم

### 9. What was the first thing you did as soon as you suspected a stroke/health issue?

- ما هو أول شيء قمت به بمجرد اشتباهك بالسكتة الدماغية/ مشكلة صحية

- ☐ Drive to the hospital
- ☐ Take body temperature or pulse
- ☐ Call relative or friend
- ☐ Call emergency 999
- ☐ Wait to see if getting better
- ☐ Get rest
- ☐ Other
- ☐ I don't know

- ☐ قيادة السيارة الى المستشفى
- ☐ أخذ درجة حرارة الجسم أو النبض
- ☐ الإتصال بالأقارب أو الأصدقاء
- ☐ مكالمة خدمة الأسعاف على رقم طوارئ 999
- ☐ الانتظار لرؤية تحسن بالحاله
- ☐ الحصول على قسط من الراحة
- ☐ أخرى
- ☐ لا أعلم

### 10. Do you think the stroke campaign affect your behavioral response at the onset of symptoms?

- هل تعتقد أن حملة السكتة الدماغية كان لها تأثير على ردك السلوكي عند بداية ظهور الأعراض

- ☐ YES
- ☐ NO

- ☐ نعم
- ☐ لا

### 11. How did the F.A.S.T campaign affect your behavioral response at the onset of any of the above mentioned symptoms?

- كيف FAST على استجاباتكم السلوكية عند بدايه ظهور الأعراض أثرت حملة التدخل السريع

---

---

---

---

---

---

---

## **National Stroke Awareness Campaign – Post Campaign Evaluation and Awareness**

الحملة الوطنية للتوعية بالسكتة الدماغية – التقييم والتوعية ما بعد الحملة - Study ID: \_\_\_\_\_ رقم الدراسة

12. How effective was the advertising in communicating the signs and symptoms of stroke and the actions to take, should you suspect a stroke?

- ما مدى فعالية الإعلان في توصيل مفهوم علامات وأعراض السكتة الدماغية, والإجراءات التي يجب اتخاذها، عند اشتباهك في حدوث السكتة الدماغية

☐ Very effective

فعاله جدا

☐ Quite effective

فعاله بشكل جيد

☐ Quite ineffective

غير فعاله بشكل جيد

☐ Very ineffective

غير فعاله جدا

☐ Don't Know

لا أعلم

*Thank you*

---
